# Supplementary material
Source: MDPI journal article supplement (https://www.mdpi.com/2079-6412/9/11/726)

Supplementary Material

# A Surface Modifier for the Production of Selectively Activated Amino Surface Groups

Kirill Puchnin, Vitaliy Grudtsov, Maria Andrianova, Stanislav Bezzubov and Alexander Kuznetsov

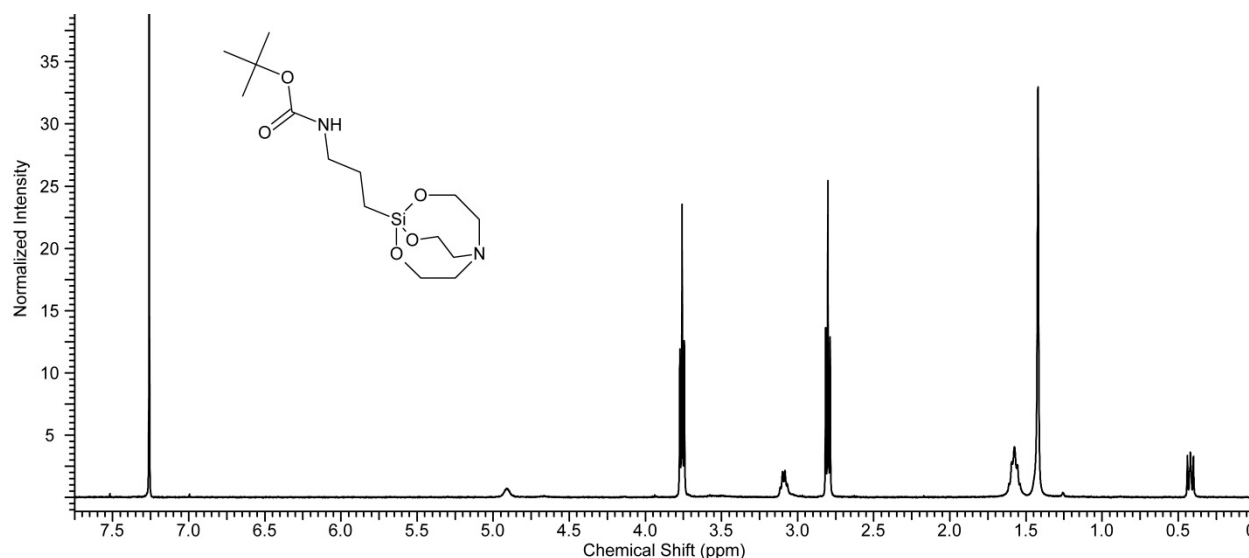

**Figure S1.**  $^1\text{H}$  NMR spectra of BocAPS,  $\text{CDCl}_3$ .

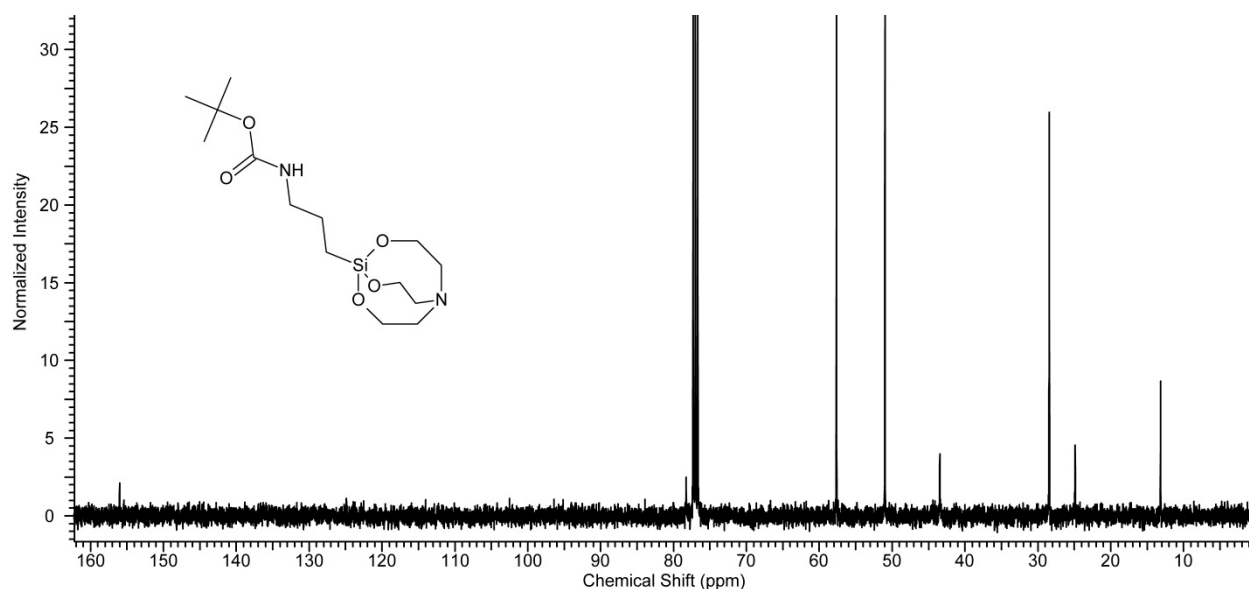

**Figure S2.**  $^{13}\text{C}$  NMR spectra of BocAPS,  $\text{CDCl}_3$ .

**Table S1.** Selected crystallographic data and details of refinement for *N-tert-butoxycarbonylamino*propyl silatrane.

| Empirical Formula                            | C <sub>14</sub> H <sub>28</sub> N <sub>2</sub> O <sub>5</sub> Si |
|----------------------------------------------|------------------------------------------------------------------|
| Formula weight                               | 332.47                                                           |
| Crystal system                               | Triclinic                                                        |
| Space group                                  | P-1                                                              |
| a (Å)                                        | 9.5590(10)                                                       |
| b (Å)                                        | 10.294(5)                                                        |
| c (Å)                                        | 10.763(4)                                                        |
| α(°)                                         | 67.14(4)                                                         |
| β(°)                                         | 84.85(3)                                                         |
| γ(°)                                         | 62.28(3)                                                         |
| V (Å <sup>3</sup> )                          | 858.5(5)                                                         |
| Z                                            | 2                                                                |
| D <sub>calcd</sub> (Mg/m <sup>3</sup> )      | 1.286                                                            |
| Radiation (CuKα)                             | λ = 1.54178 Å                                                    |
| T (K)                                        | 290(2)                                                           |
| θ range (°)                                  | 4.49–65.17                                                       |
| Total reflections                            | 5713                                                             |
| Unique reflections                           | 2920                                                             |
| Parameters / restraints                      | 231 / 15                                                         |
| R <sub>1</sub> ; wR <sub>2</sub> (I > 2σ(I)) | 0.0404, 0.0880                                                   |
| Goodness-of-fit on F <sup>2</sup>            | 1.029                                                            |

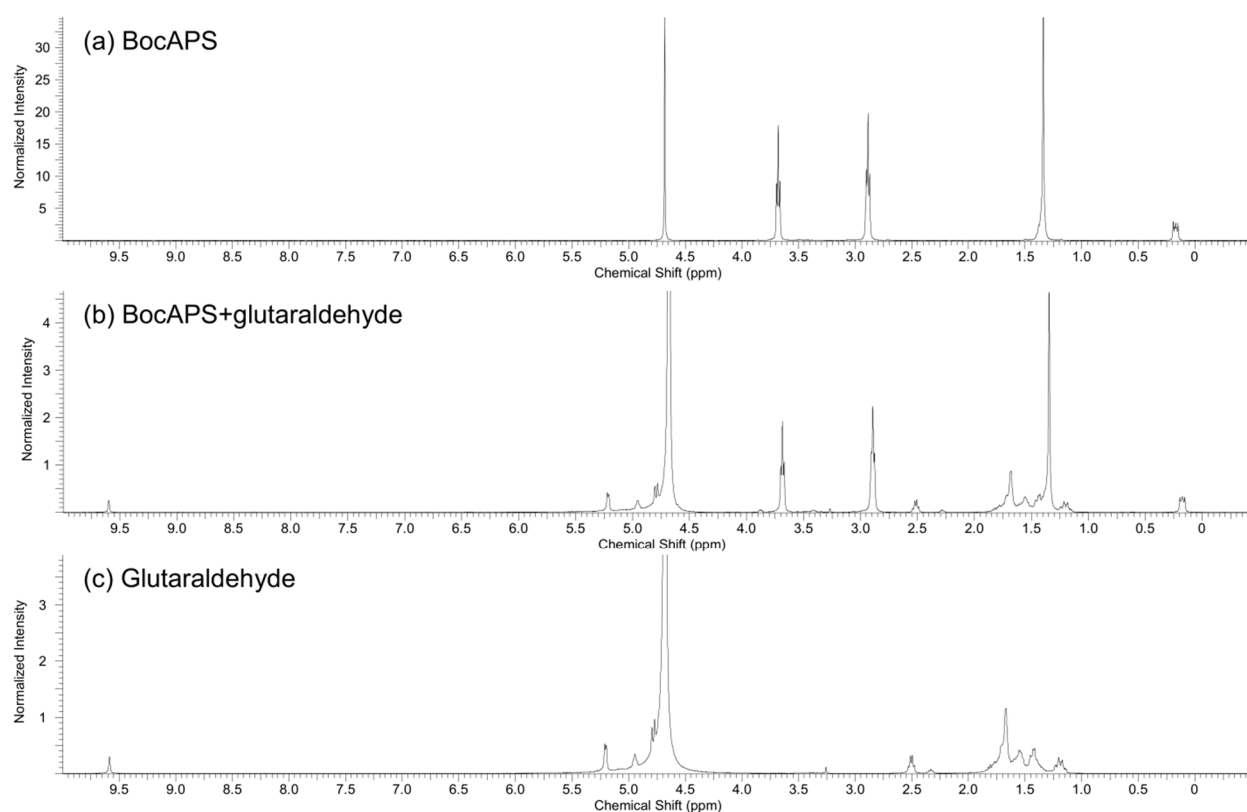**Figure S3.** <sup>1</sup>H NMR spectra of **BocAPS** (a), glutaraldehyde (c), mixture of **BocAPS** and glutaraldehyde after 30 min (b), D<sub>2</sub>O.

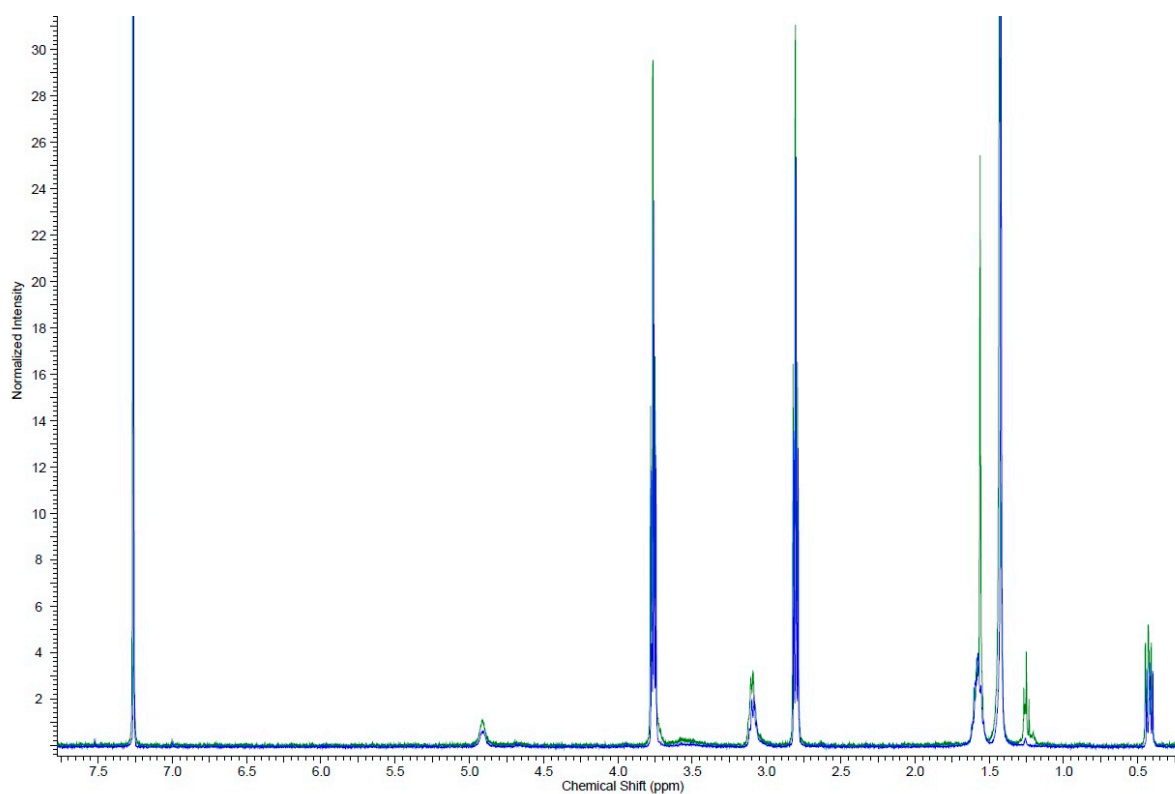

**Figure S4.**  $^1\text{H}$  NMR spectra of **BocAPS** obtained recently (green, there are residues of DMF) and after two years of storage at room conditions (blue),  $\text{CDCl}_3$ .

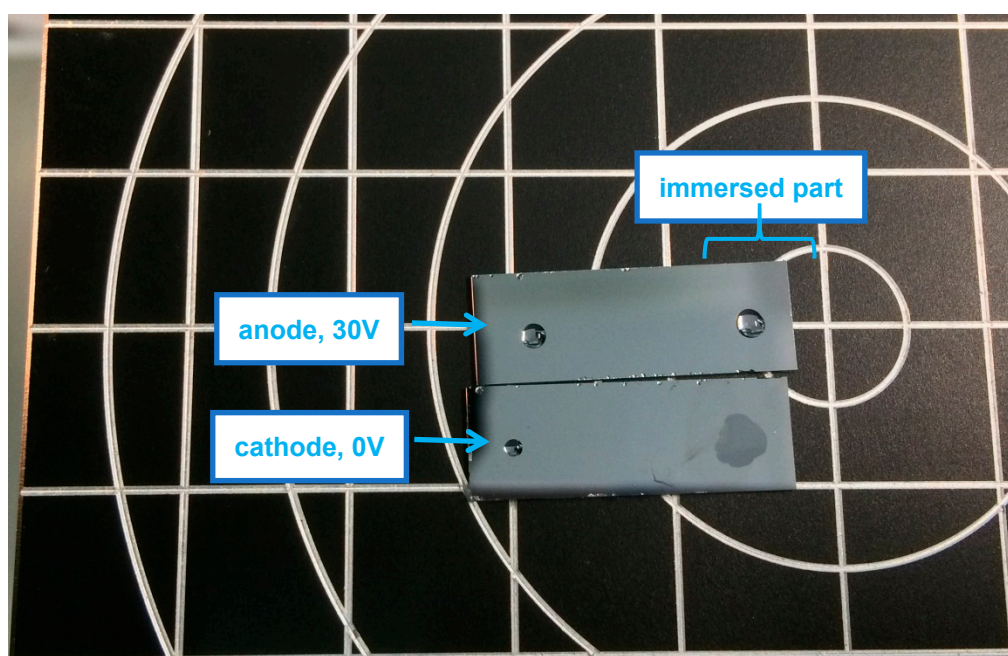

**Figure S5.** Wettability of parts of the anode and cathode after electrochemical removal of Boc-groups.

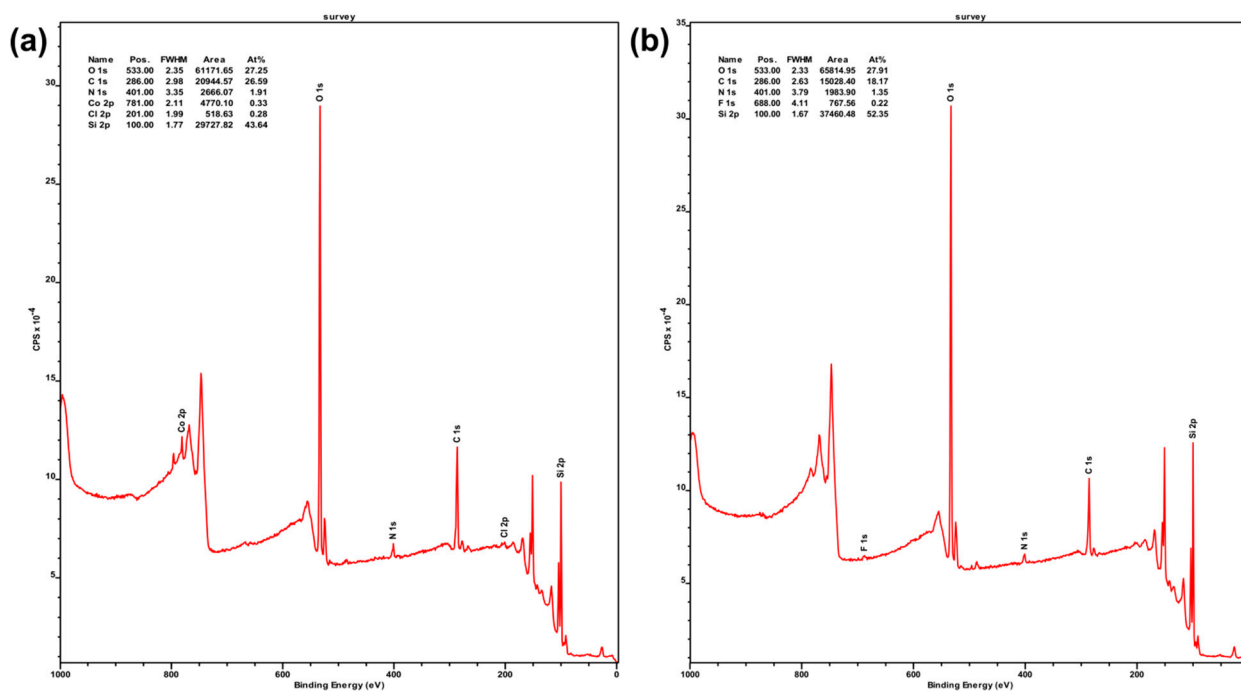

**Figure S6.** Survey XPS spectra of the BocAPS-modified SiO<sub>2</sub> surface (a) and BocAPS-modified SiO<sub>2</sub> surface with removed Boc-groups (b).

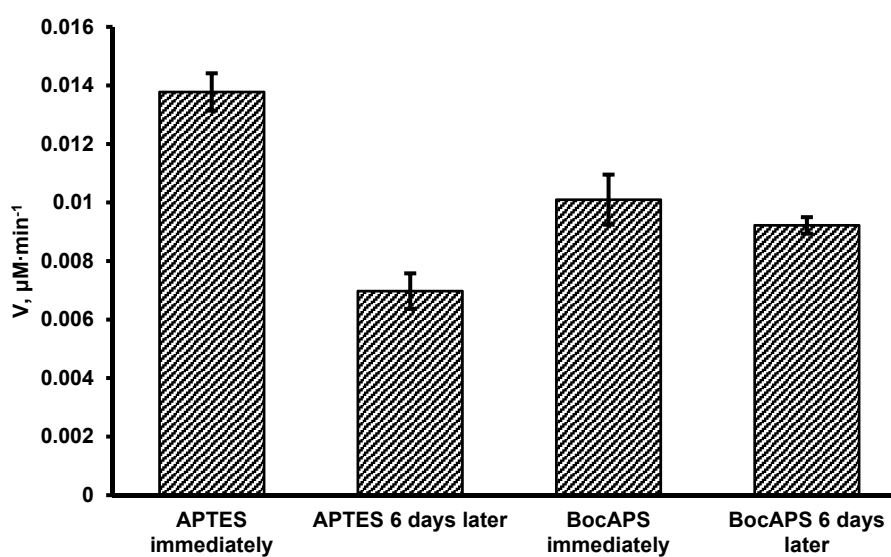

**Figure S7.** The activity of glucose oxidase immobilized on silicon slides, which were modified by APTES or BocAPS and had different holding times (at room conditions) between the formation of SAM and the immobilization of the enzyme.

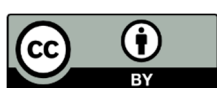

Supplement: s1 [file s1]
